# Supplementary material for: Arabidopsis ABCG14 forms a homodimeric transporter for multiple cytokinins and mediates long-distance transport of isopentenyladenine-type cytokinins
Source: PubMed Central journal article supplement — Plant Commun. 2022 Oct 28;4(2):100468. doi: 10.1016/j.xplc.2022.100468 (PMC10030318; doi:10.1016/j.xplc.2022.100468), 2022-10-28
Supplement: mmc1.pdf [file mmc1.pdf]

Plant Communications, Volume 4

## Supplemental information

***Arabidopsis* ABCG14 forms a homodimeric transporter for multiple cytokinins and mediates long-distance transport of isopentenyladenine-type cytokinins**

Jiangzhe Zhao, Xiaojuan Deng, Jiayun Qian, Ting Liu, Min Ju, Juan Li, Qin Yang, Xiaoxian Zhu, Weiqiang Li, Chang-Jun Liu, Zhigang Jin, and Kewei Zhang

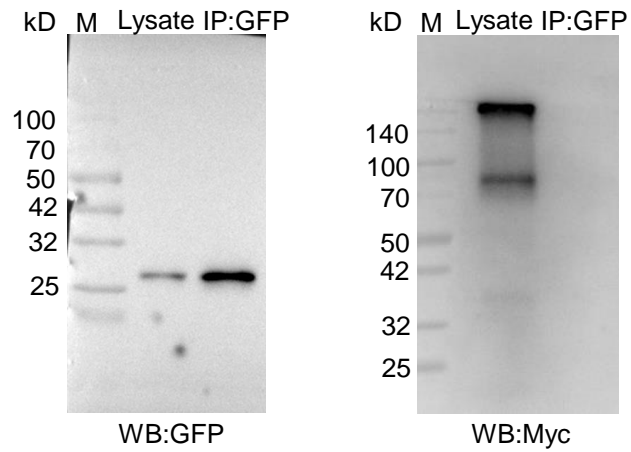

**Supplemental Figure 1. Co-IP assay of free GFP and Myc-AtABCG14 expression in tobacco leaves.** Total protein was extracted from tobacco leaves with co-expression of free GFP and Myc-AtABCG14.

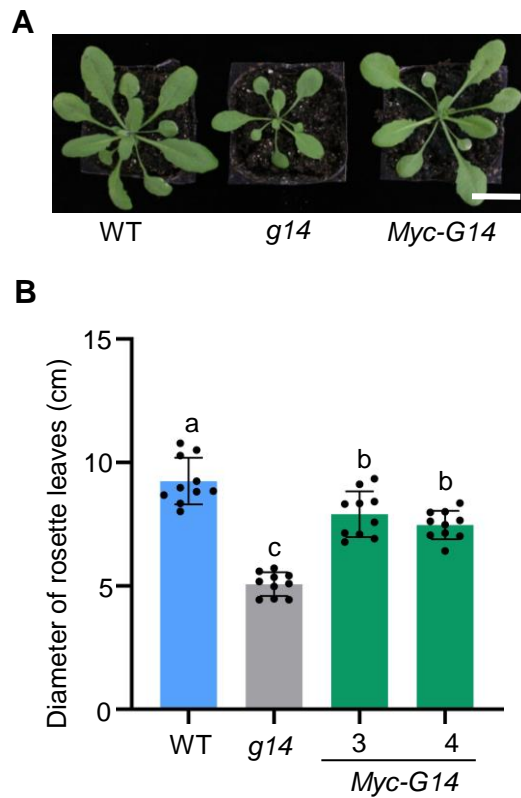

**Supplemental Figure 2. Phenotypes of *atabcg14* mutant plants complemented by *Myc-AtABCG14* fusion gene.** (A) Phenotypes of 20-DAG *atabcg14* plants complemented with *Myc-AtABCG14* gene driven by 35S promoter. Scale bar, 2 cm. (B) Rosette leaf diameters of the plants in (A). The data are means  $\pm$  SD,  $n = 10$ . Groups marked by different letters are significantly different ( $P < 0.05$ , ANOVA). *G14* represents *AtABCG14*.

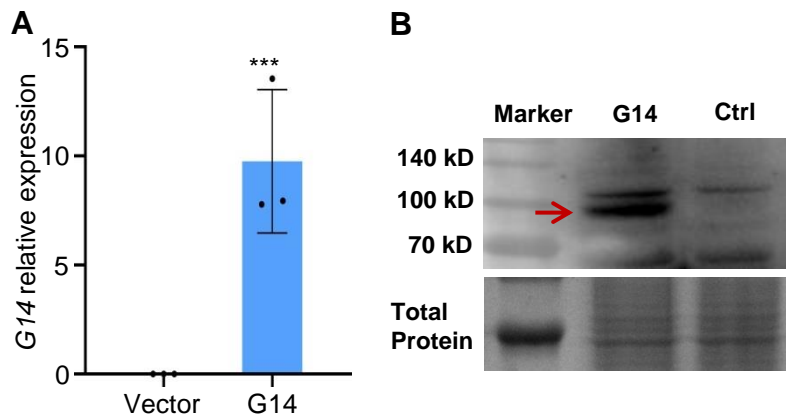

**Supplemental Figure 3. The expression of *AtABCG14* in BY-2 cells transformed with *35S::GFP-AtABCG14*.** (A) Stable expression of empty vector *35S::GFP* (RCS2) and *35S::GFP-AtABCG14* in BY-2. The transcript levels of the target genes were normalized to that of *ACTIN2*. Data are means  $\pm$  SD ( $n = 4$ ). (B) Detection of GFP-*AtABCG14* fusion protein expression in BY-2 by immunoblotting. The red arrow indicates GFP-*AtABCG14* protein. \*\*\* $P < 0.001$  (Student's  $t$ -test). G14 represents *AtABCG14*.

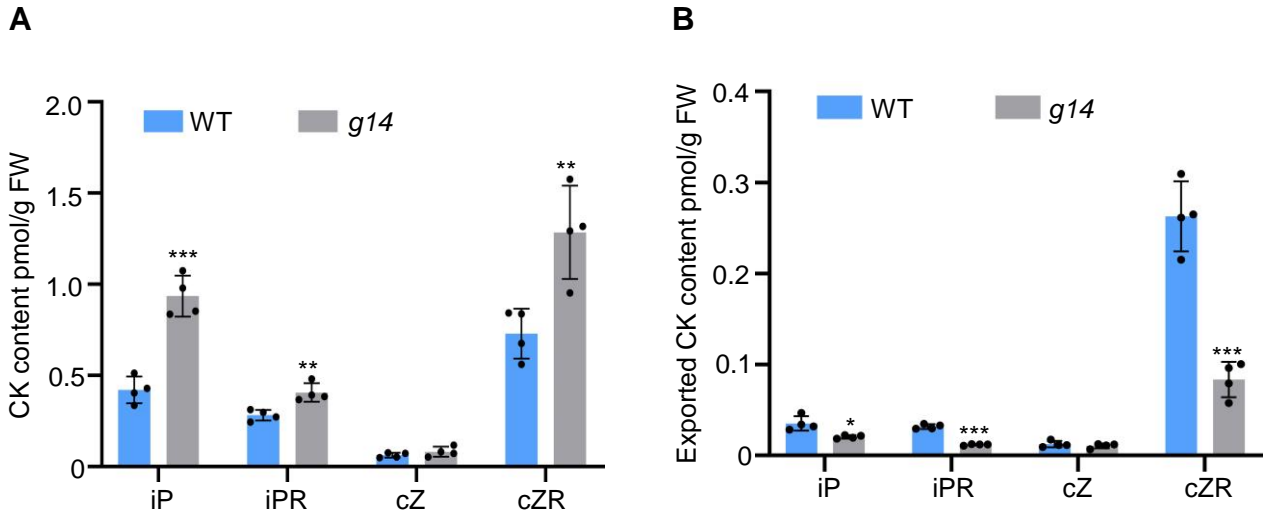

**Supplemental Figure 4. Less CKs exported from *atabcg14* mutant.** (A) Quantification of iP, iPR, cZ and cZR in WT *Arabidopsis* cells and *atabcg14* mutant cells 5 d after subculture. Data are means  $\pm$  SD ( $n = 4$ ). (B) Quantification of the exported iP, iPR, cZ and cZR in the B5 medium culturing WT *Arabidopsis* cells and *atabcg14* mutant cells at 4 hours. Data are means  $\pm$  SD ( $n = 4$ ). \*, \*\* and \*\*\* indicate  $P$ -values of  $P < 0.05$ ,  $P < 0.01$  and  $P < 0.001$  respectively, from Student's  $t$ -test.

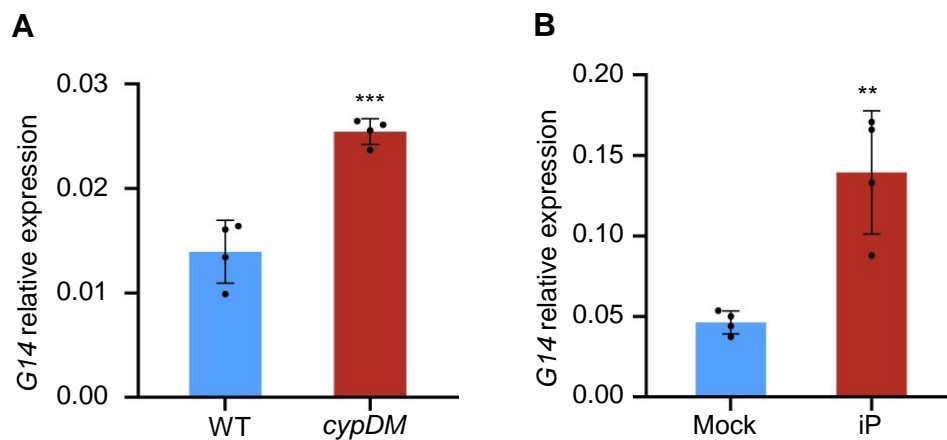

**Supplemental Figure 5. Expression of *AtABCG14* was induced by iP.** (A) RT-qPCR analysis of *AtABCG14* expression in 8-DAG seedlings of WT and *cypDM*. Data are means  $\pm$  SD ( $n = 4$ ). (B) RT-qPCR analysis of *AtABCG14* expression of 8-DAG seedlings of *cypDM* treated with 1  $\mu$ M iP for 4 h. Data are means  $\pm$  SD ( $n = 4$ ). \*\* $P < 0.01$ , \*\*\* $P < 0.001$  (Student's *t*-test). G14 represents *AtABCG14*.

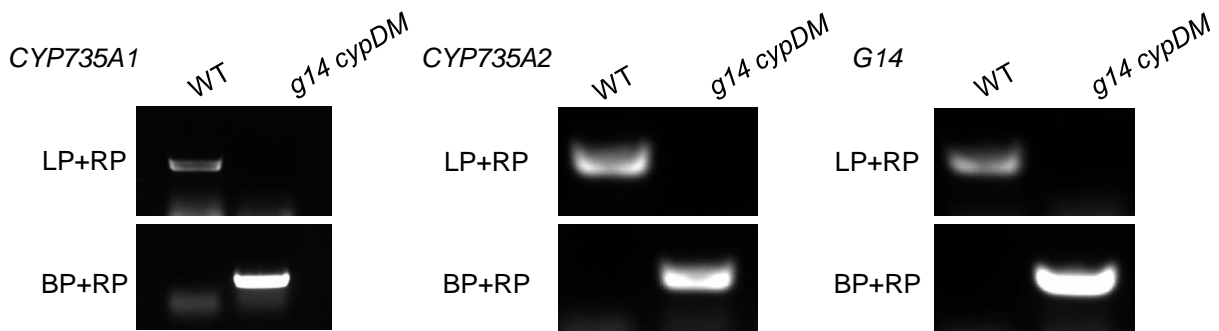

**Supplemental Figure 6. Characterization of *atabcg14 cypDM* triple mutant.** *atabcg14 cypDM* triple mutant lines were obtained by crossing *atabcg14* with double mutant *cypDM*. Sepecific primers CYP735A1-P1, P2 and T-DNA border primer LB1.3 were used for identifying T-DNA insertion of *cyp735a1* mutant. Sepecific primers CYP735A2-P1, P2 and T-DNA border primer LB1.3 were used for identifying T-DNA insertion of *cyp735a2* mutant. Sepecific primers AtABCG14-P7, -P8 (amplifying genomic DNA fragment of *AtABCG14*) and pSKTAIL, AtABCG14-P11 (amplifying T-DNA fragment) were used for identifying T-DNA insertion of *atabcg14* mutant. *g14cypDM*, *atabcg14 cypDM*.

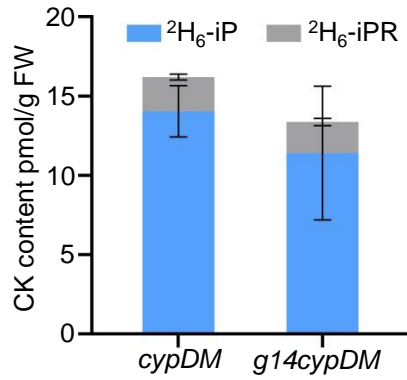

**Supplemental Figure 7.  $^2\text{H}$ -labeled iP and iPR in *atabcg14 cypDM* roots.** Roots of the 8-DAG *cypDM* and *atabcg14 cypDM* seedlings were incubated with 50 nM  $^2\text{H}_6$ -iP for 1 h. The roots were harvested for CK quantification.



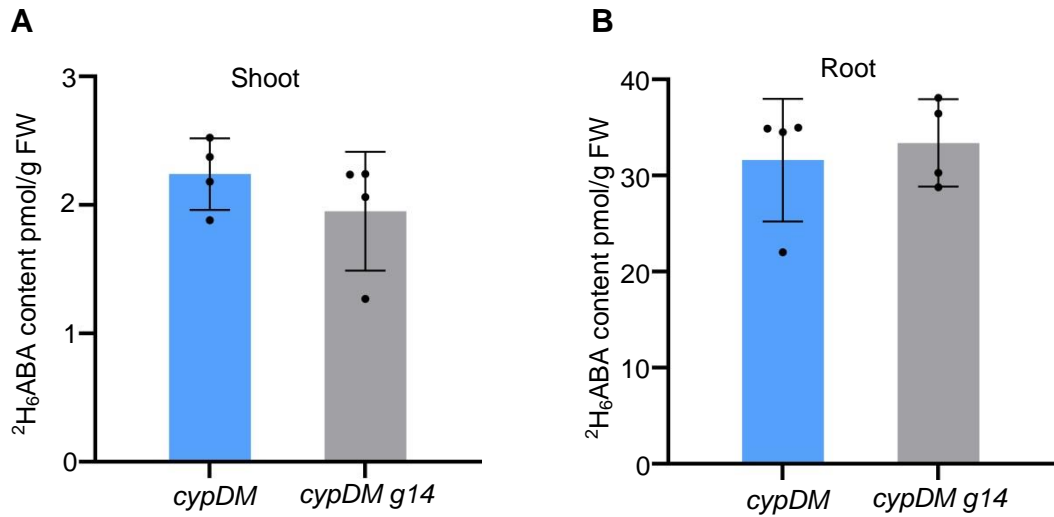

**Supplemental Figure 8. Translocation of  $^2\text{H}_6\text{-ABA}$  in *atabcg14 cypDM*.** Roots of the 8-DAG *cypDM* and *atabcg14 cypDM* seedlings were incubated with 50 nM  $^2\text{H}_6\text{-ABA}$  for 1 h. The shoots (A) and roots (B) were harvested for  $^2\text{H}_6\text{-ABA}$  quantification. Data are means  $\pm$  SD,  $n = 4$ .

**A**  $\frac{cypDM}{cypDM}$   $\frac{g14cypDM}{g14cypDM}$   $\frac{g14cypDM}{cypDM}$   $\frac{cypDM}{g14cypDM}$

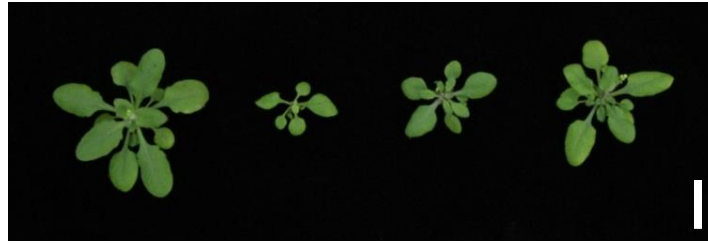

**B**

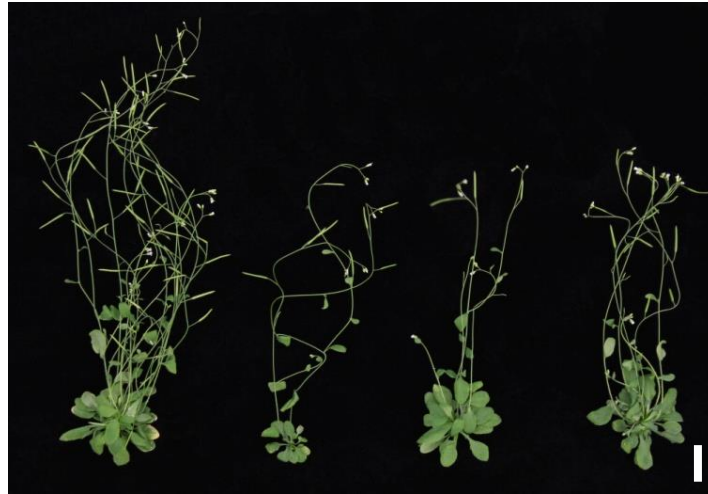

**C**

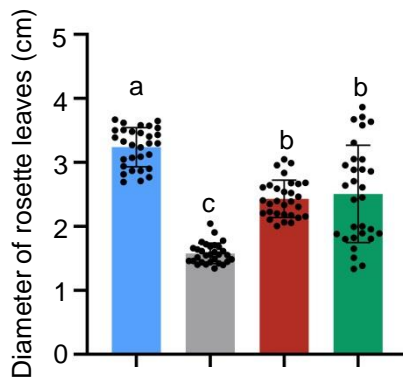

**D**

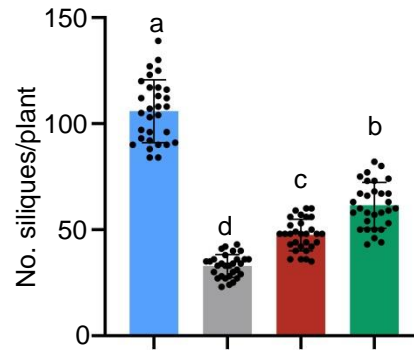

**E**

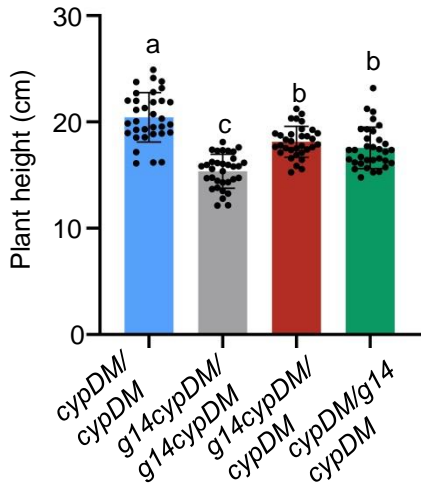

**F**

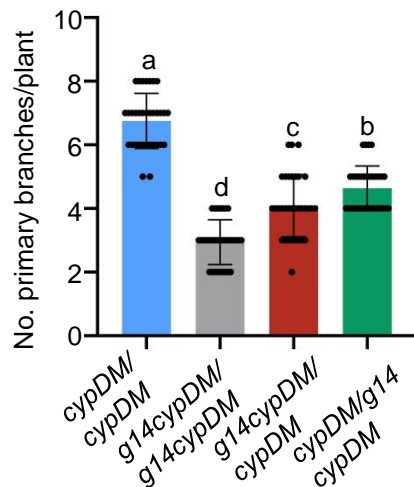

**Supplemental Figure 9. The phenotypes of the grafted plants between *cypDM* and *atabcg14 cypDM*.** (A) Morphological phenotypes of 25-DAG *cypDM/cypDM*, *atabcg14 cypDM/atabcg14 cypDM*, *atabcg14 cypDM/cypDM*, *cypDM/atabcg14 cypDM* grown on soil. Scale bar, 1.5 cm. (B) Phenotypes of 35-DAG *cypDM/cypDM*, *atabcg14cypDM/atabcg14cypDM*, *atabcg14cypDM/cypDM*, *cypDM/atabcg14cypDM*. Scale bar, 1.5 cm. (C) Quantification of rosette diameter in (A). Data are means  $\pm$  SD ( $n = 30$ ). (D–F) Quantification of number of siliques per plant (D), plant height (E) and number of primary rosette branches per plant (F) in (B). Data are means  $\pm$  SD ( $n = 30$ ). Groups marked by different letters are significantly different ( $P < 0.05$ , ANOVA). *g14cypDM*, *atabcg14 cypDM*.

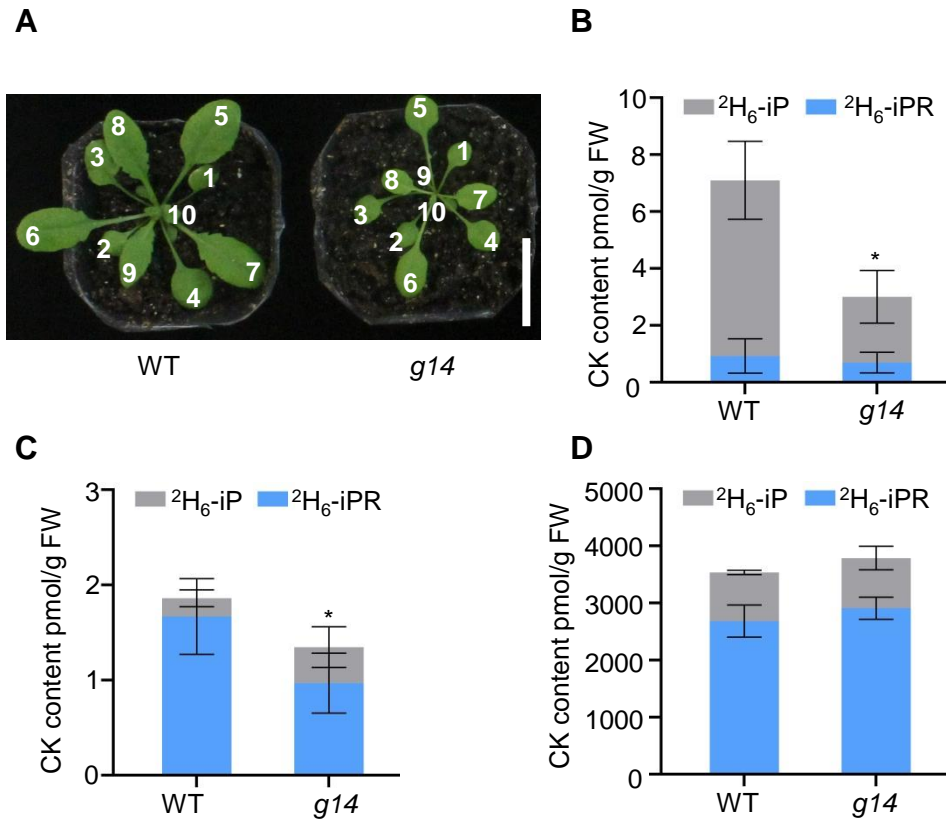

**Supplemental Figure 10. Phloem unloading of iP-type CKs was mediated by AtABCG14.** (A) Morphological phenotypes of 21-DAG WT and *atabcg14* plants. The 3<sup>rd</sup> and 4<sup>th</sup> leaves of plants were dripped with 5 ppm  $^2\text{H}_6\text{-iP}$  (7  $\mu\text{L}/\text{cm}^2$  leaf area) and incubated for 6 h. Then the roots (B), the younger (from the 5<sup>th</sup> to 10<sup>th</sup>) leaves (C) and the 3<sup>rd</sup> and 4<sup>th</sup> leaves (D) were harvested for quantification of  $^2\text{H}_6\text{-iP}$  and  $^2\text{H}_6\text{-iPR}$ . Data are means  $\pm$  SD ( $n = 3$ ), \* $P < 0.5$  (Student's *t*-test). Scale bars, 2 cm for (A). *g14* represents *atabcg14*. FW, fresh weight.

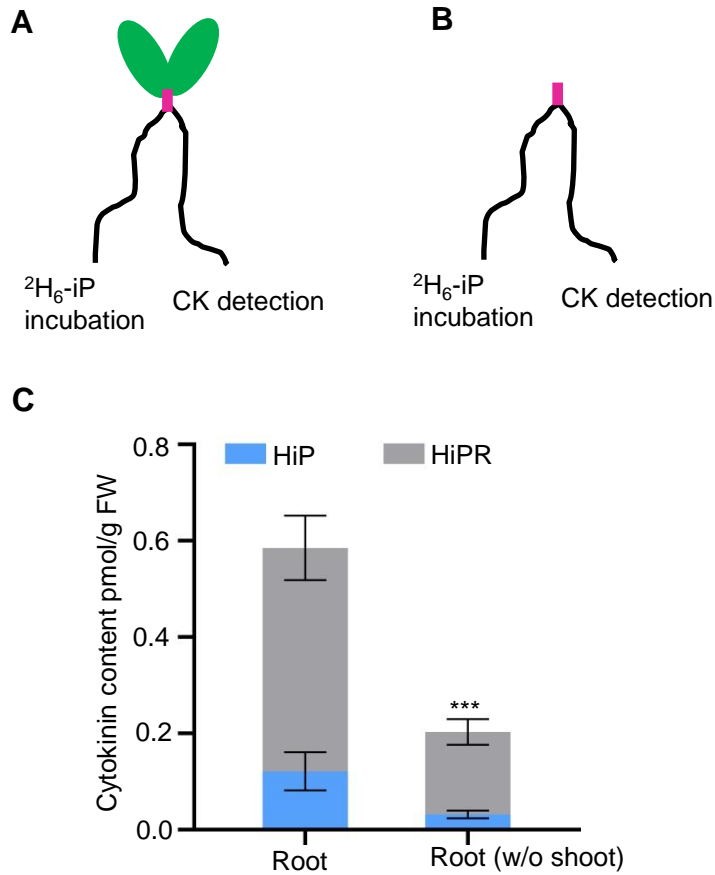

**Supplemental Figure 11. Circulated transport of iP-type CKs in *Arabidopsis* seedlings.** (A) and (B) The WT plants were incubated under split-root with shoot (A) and without shoot (B) conditions with or without  $^2\text{H}_6$ -labeled iP. (C) Quantification of  $^2\text{H}_6$ -labeled iP and iPR contents in the root (without feeding  $^2\text{H}_6$ -labeled iP) after feeding with  $^2\text{H}_6$ -iP for 4 h in (A and B). Data are means  $\pm$  SD,  $n = 4$ . \*\*\* $P < 0.001$  (Student's  $t$ -test). FW, fresh weight.

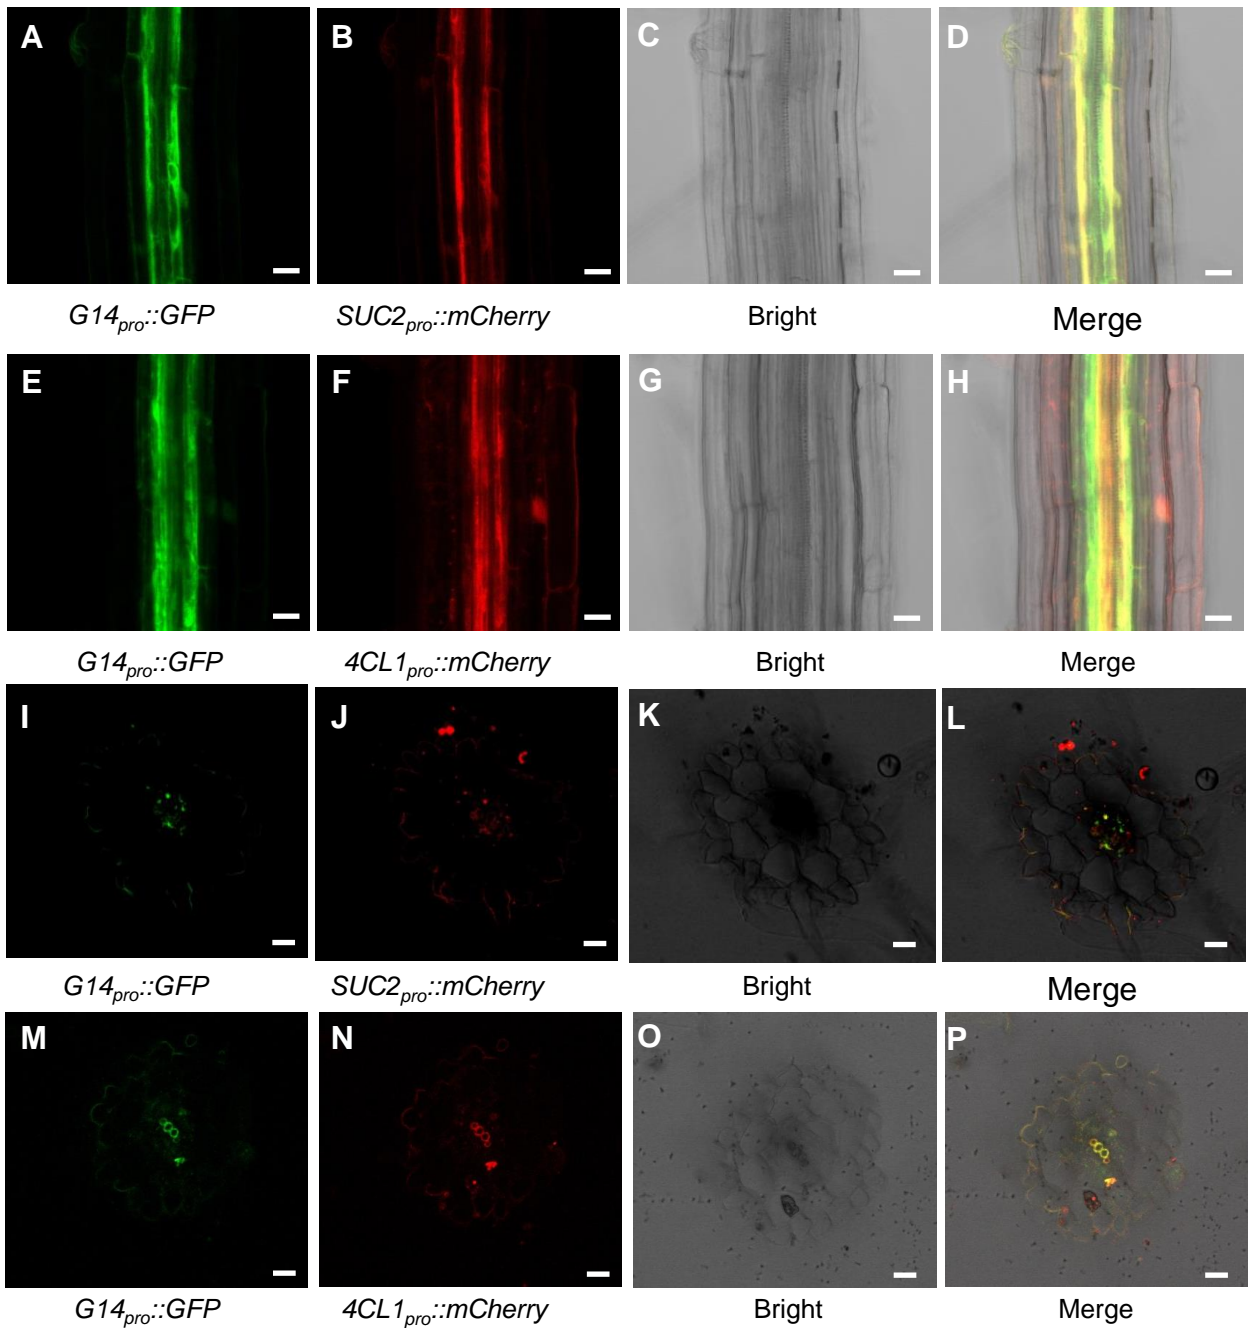

**Supplemental Figure 12. Co-expression of *AtABCG14*, *SUC2*, and *4CL1* in the root steles of *Arabidopsis* seedlings.** (A), (E), (I) and (M), GFP fluorescence. (B), (F), (J) and (N), mCherry fluorescence. (C), (G), (K) and (O), Bright field. (D), (H), (L) and (P), merged signals. Scale bars = 20  $\mu\text{m}$ . The seedlings for fluorescence observation are *AtABCG14*<sub>pro</sub>::*GFP* and *SUC2*<sub>pro</sub>::*mCherry* or *AtABCG14*<sub>pro</sub>::*GFP* and *4CL1*<sub>pro</sub>::*mCherry* double-transgenic plants. *G14*<sub>pro</sub>::*GFP*, *SUC2*<sub>pro</sub>::*mCherry* and *4CL1*<sub>pro</sub>::*mCherry* indicate transgenic plants of WT transformed with GFP and mCherry under *AtABCG14* promoter and *4CL1* promoter, and *SUC2* promoter.

**Supplemental Table S1. Primers used in this study.**

| Primer name   | Primer sequences (5'-3')                          | Restriction site<br>(with underline) | Purpose                                               |
|---------------|---------------------------------------------------|--------------------------------------|-------------------------------------------------------|
| AtABCG14-P1   | GCAGGCTCC <u>GAATTC</u> ATCCCATCGATTTAAAGCTATG    | EcoR I                               | For constructing Myc-and Flag-AtABCG14                |
| AtABCG14-P2   | AAGCTGGGTC <u>GAATTC</u> TACCAGCAACTTCACCCGATGCAG | EcoR I                               | expression in Arabidopsis                             |
| AtABCG14-P3   | CGAGCGGCCCGGATCCATGGTGAGCAAGGGCGAGGA              | BamH I                               | For constructing AtABCG14-pDR195 expression in        |
| AtABCG14-P4   | AGTCCAAAGCTGGATCCCTACCAGCAACTTCACCCGATG           | BamH I                               | yeast                                                 |
| ACTIN-F       | GGTAACATTGTGCTCAGTGGTGG                           |                                      | The standard gene for qRT-PCR                         |
| ACTIN-R       | CTCGGCCTTGGAGATCCACATC                            |                                      |                                                       |
| AtABCG14-P5   | TCGGTGCTCTGCTTATGAAC                              |                                      | For AtABCG14 qRT-PCR                                  |
| AtABCG14-P6   | ACGATGAAGGGAGGAATTTG                              |                                      |                                                       |
| LB1.3         | ATTTTGCCGATTTCGGAAC                               |                                      | SALK T-DNA insert line order primer (BP)              |
| AtABCG14-P7   | TGCTGAGCTTTTGAGTTGTACC                            |                                      | For <i>atabcg14</i> homozygote identification (LP+RP) |
| AtABCG14-P8   | CACAATGCGATGAGCAGTGG                              |                                      |                                                       |
| AtCYP735A1-P1 | AGGTGATCGATGGACATATGC                             |                                      | For <i>cyp735a1</i> homozygote identification (LP+RP) |
| AtCYP735A1-P2 | AGAAGCACTTCGCATGATCAC                             |                                      |                                                       |
| AtCYP735A2-P1 | TCAAAAATGACTGAAATGGCC                             |                                      | For <i>cyp735a2</i> homozygote identification (LP+RP) |
| AtCYP735A2-P2 | ATTATGAGCAAGGAGCATG                               |                                      |                                                       |
| AtABCG14-P9   | ATGCCTCAGAACTGCATAGCACCAAGGCCT                    |                                      | For pCS2 vector construction                          |
| AtABCG14-P10  | <u>GCATCTAG</u> ACCGCAACTTCACCCGATGCAG            | Xba I                                |                                                       |
| pSKTAIL       | ATACGACGGATCGTAATTTGTCG                           |                                      | T-DNA insert line order primer for <i>abcg14</i> (BP) |
| AtABCG14-P11  | ATGCCTCAGAACTGCATAGCAC                            |                                      | For <i>atabcg14</i> homozygote identification (RP)    |
